# Supplementary material for: Sustainable lignin-derived hierarchically porous carbon for capacitive deionization applications
Source: Royal Society of Chemistry journal article supplement (doi:10.1039/d0nj02424d), 2020-01-01
Supplement: d0nj02424d1.pdf [file d0nj02424d1.pdf]

## Supplementary information

# Sustainable Lignin-derived Hierarchically Porous Carbon for Capacitive Deionization Applications

Saowaluk Chaleawlerumpon<sup>\*a</sup> and Nuttaporn Pimpha<sup>a</sup>

<sup>a</sup>National Nanotechnology Center, National Science and Technology Development Agency,  
Thailand Science Park, Pathum Thani 12120, Thailand

\*E-mail: saowaluk@nanotec.or.th

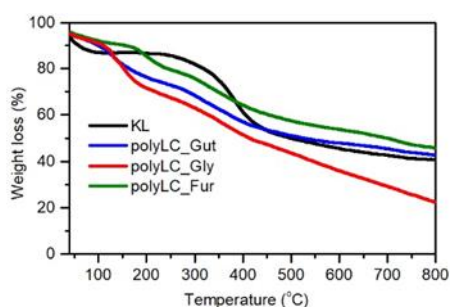

Fig. S1 TGA curves of the samples.

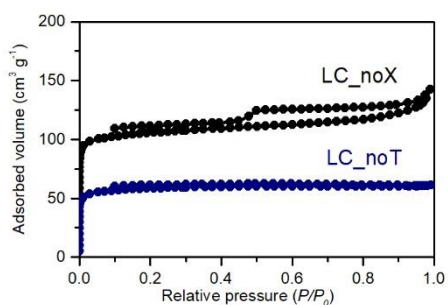

Fig. S2 N<sub>2</sub> adsorption/desorption isotherm of LC samples: prepared without cross-linking agent (LC\_noX) and without template (LC\_noT).

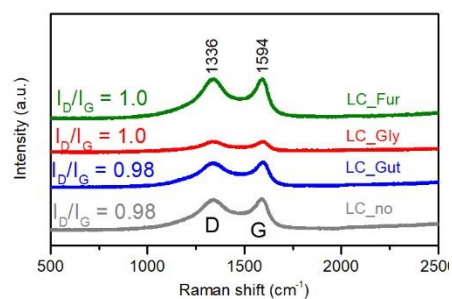

Fig. S3 Raman spectra of LCs samples.

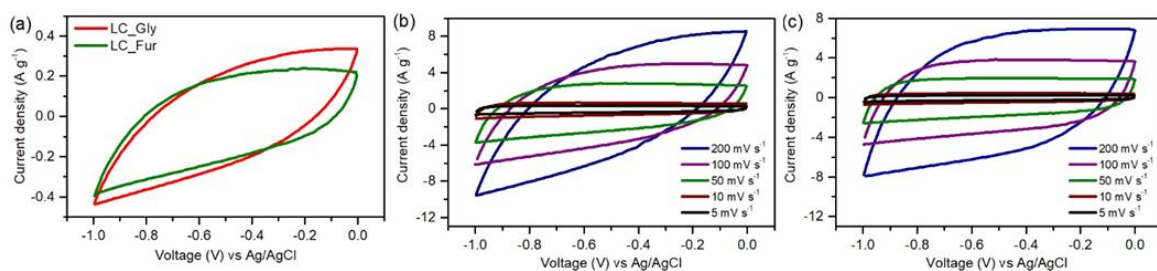

**Fig. S4** CV curves of (a) LC\_Gly and LC\_Fur electrodes in 500 mg L<sup>-1</sup> (~8.5 mM) NaCl electrolyte at a scan rate of 10 mV s<sup>-1</sup>, (b) LC\_Gly electrode and (c) LC\_Fur electrodes at different scan rates in 1 M NaCl electrolyte.

With decreasing the concentration of NaCl electrolyte (1M to 8.5 mM), the specific capacitance of LC\_Gly electrode decreased from 47 to 23.8 F g<sup>-1</sup> (-49%). While LC\_Fur electrode had a greater reduction by 68% which dropped from 68 to 24.4 F g<sup>-1</sup>, compared to LC\_Gly electrode. This supported well with an ion-dependent process of EDLs formation<sup>1-4</sup>. Particularly, the micro-dominant electrode material (LC\_Fur) was significantly hindered by the decreasing the ion mobility in the inner pores.

**Table S1** Parameters for CDI performance

| Sample | SAC (mg g <sup>-1</sup> ) | Pseudo-second order model     |                                            |                       |
|--------|---------------------------|-------------------------------|--------------------------------------------|-----------------------|
|        |                           | <i>k</i> (min <sup>-1</sup> ) | <i>q<sub>e</sub></i> (mg g <sup>-1</sup> ) | <i>r</i> <sup>2</sup> |
| LC_Gly | 16.84                     | 0.053                         | 15.5                                       | 0.9392                |
| LC_Fur | 8.69                      | 0.029                         | 1.13                                       | 0.9662                |

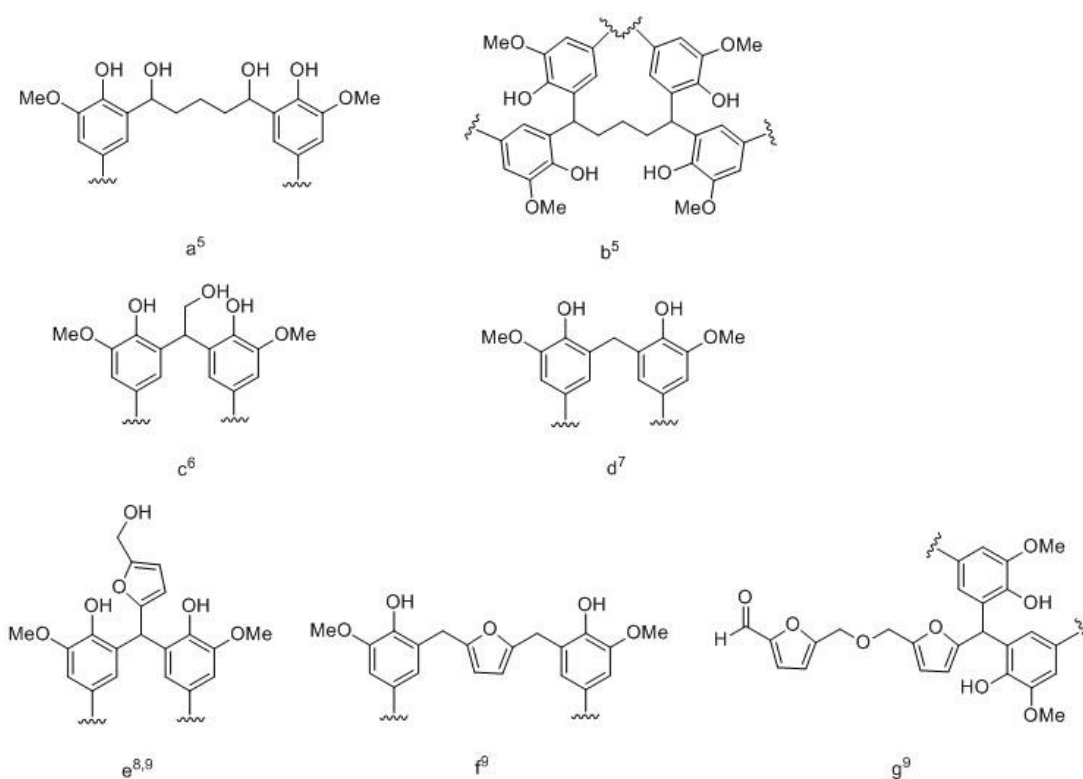

**Chart S1** Possible structures of polyLC\_Gut (a, b), polyLC\_Gly (c, d), and polyLC\_Fur (e, f, g).

## References

- 1 R. A. Rica, R. Ziano, D. Salerno, F. Mantegazza, M. Z. Bazant and D. Brogioli, *Electrochim. Acta*, 2013, 92, 304-314.
- 2 S. Porada, R. Zhao, A. van der Wal, V. Presser and P. M. Biesheuvel, *Prog. Mater. Sci.* 2013, 58, 1388-1442.
- 3 J. C. Icaza and R. K. Guduru, *J. Power Sources* 2016, 336, 360-366.
- 4 H. Shao, Y.-C. Wu, Z. Lin, P.-L. Taberna and P. Simon, *Chem. Soc. Rev.* 2020, 49, 3005-3039.
- 5 C. G. da Silva, S. Grelier, F. Pichavant, E. Frollini and A. Castellan, *Ind. Crops Prod.*, 2013, 42, 87-95.
- 6 P. Navarrete, A. Pizzi, H. Pasch and L. Delmotte, *J. Adhes. Sci. Technol.*, 2012, 26, 1069-1082.
- 7 H. Li, D. Yuan, C. Tang, S. Wang, J. Sun, Z. Li, T. Tang, F. Wang, H. Gong and C. He, *Carbon*, 2016, 100, 151-157.
- 8 F.-J. Santiago-Medina, A. Pizzi and S. Abdalla, *J. Renew. Mater.*, 2017, 13, 1-13.
- 9 M. A. Hubbe, A. Pizzi, H. Zhang and R. Halis, *BioRes.*, 2018, 13, 2049-2115.
